# Supplementary material for: Density functional theory study of the corrosion inhibition performance of 6-mercaptopurine and 6-thioguanine expired drugs toward the aluminium (111) surface
Source: Royal Society of Chemistry journal article supplement (doi:10.1039/d3ra04954j), 2023-01-01
Supplement: d3ra04954j1.pdf [file d3ra04954j1.pdf]

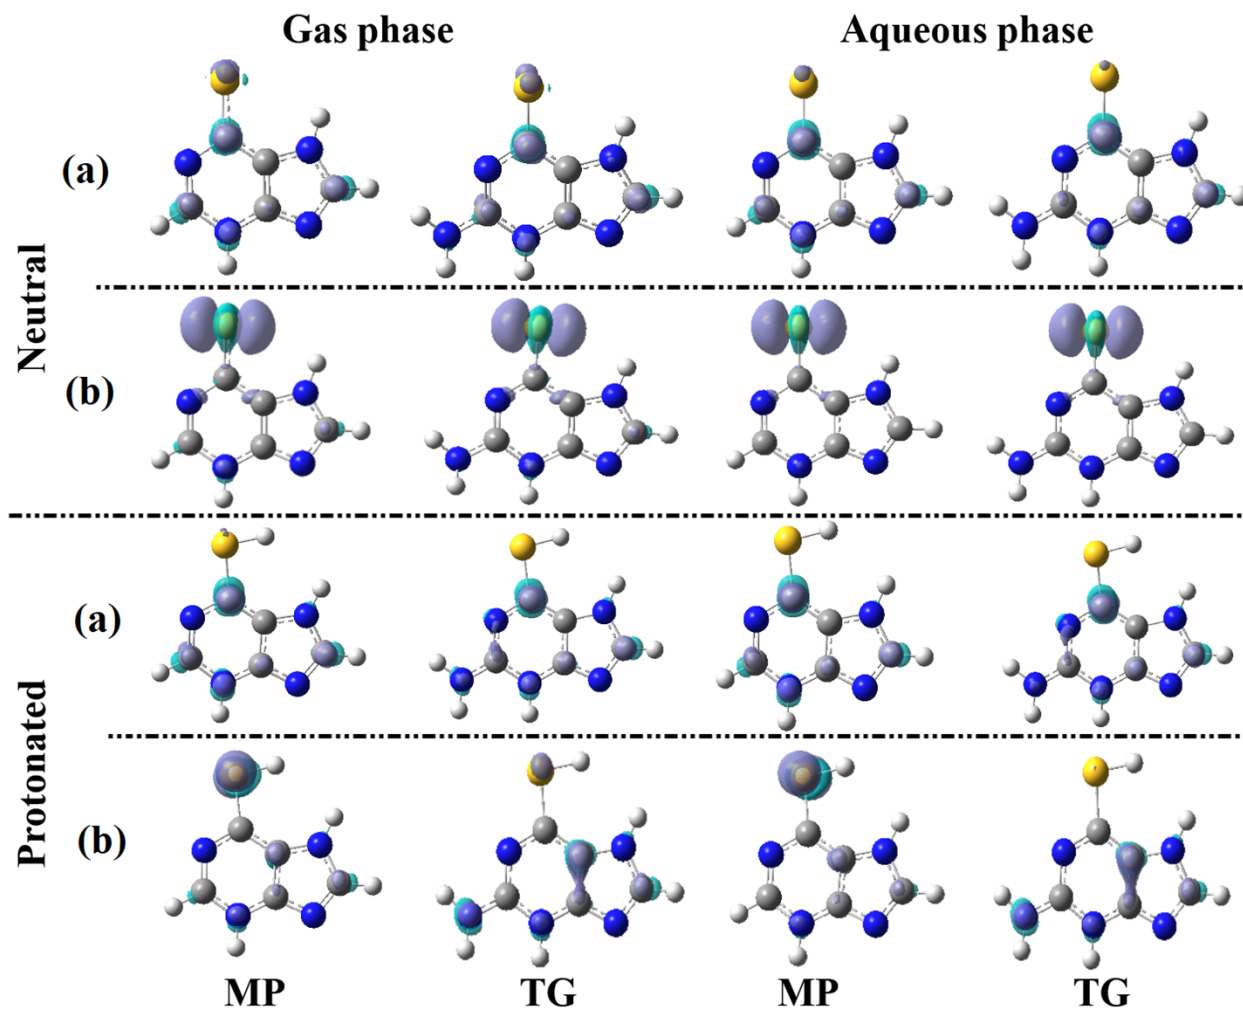

**Figure S1.** Plots of (a) nucleophilic ( $f_k^+(r)$ ) and (b) electrophilic ( $f_k^-(r)$ ) Fukui function indices isosurfaces of the 6-Mercaptopurine (MP) and 6-Thioguanine (TG) drugs.
